# Supplementary material for: Endogenous retroviruses drive species-specific germline transcriptomes in mammals
Source: bioRxiv or medRxiv preprint supplement (doi:10.1101/2020.03.11.987230), 2020-03-11
Supplement: Supplementary file [file media-1.pdf]

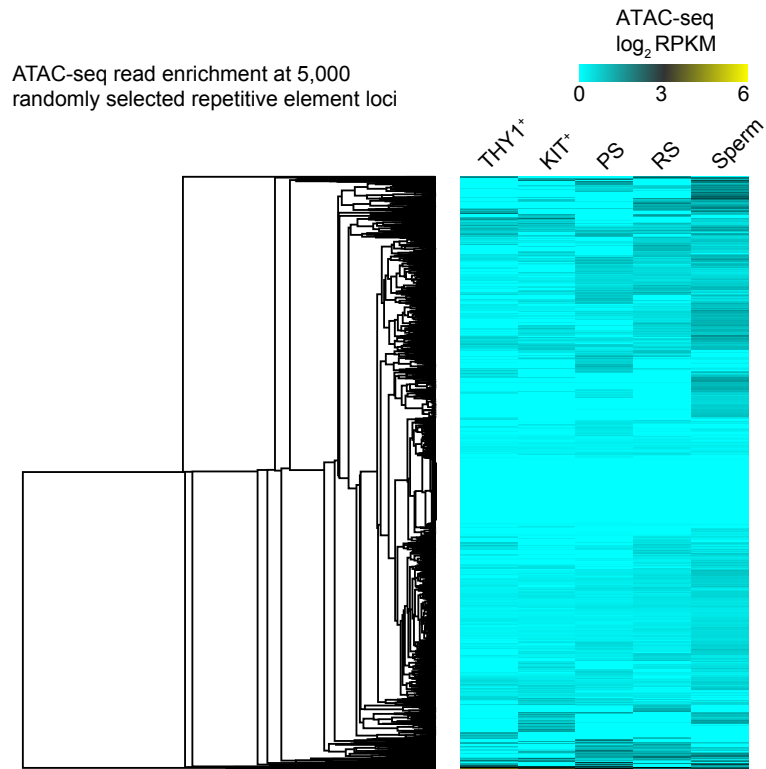

**Supplementary Figure 1. ATAC-seq read enrichment at 5,000 randomly selected repetitive element loci.**

Heat map depicting RPKM-normalized ATAC-seq reads at 5,000 randomly selected repetitive element loci during spermatogenesis. THY1<sup>+</sup>, undifferentiated spermatogonia; KIT<sup>+</sup>, differentiating spermatogonia; PS, pachytene spermatocyte; RS, round spermatids; Sperm: epididymal spermatozoa.

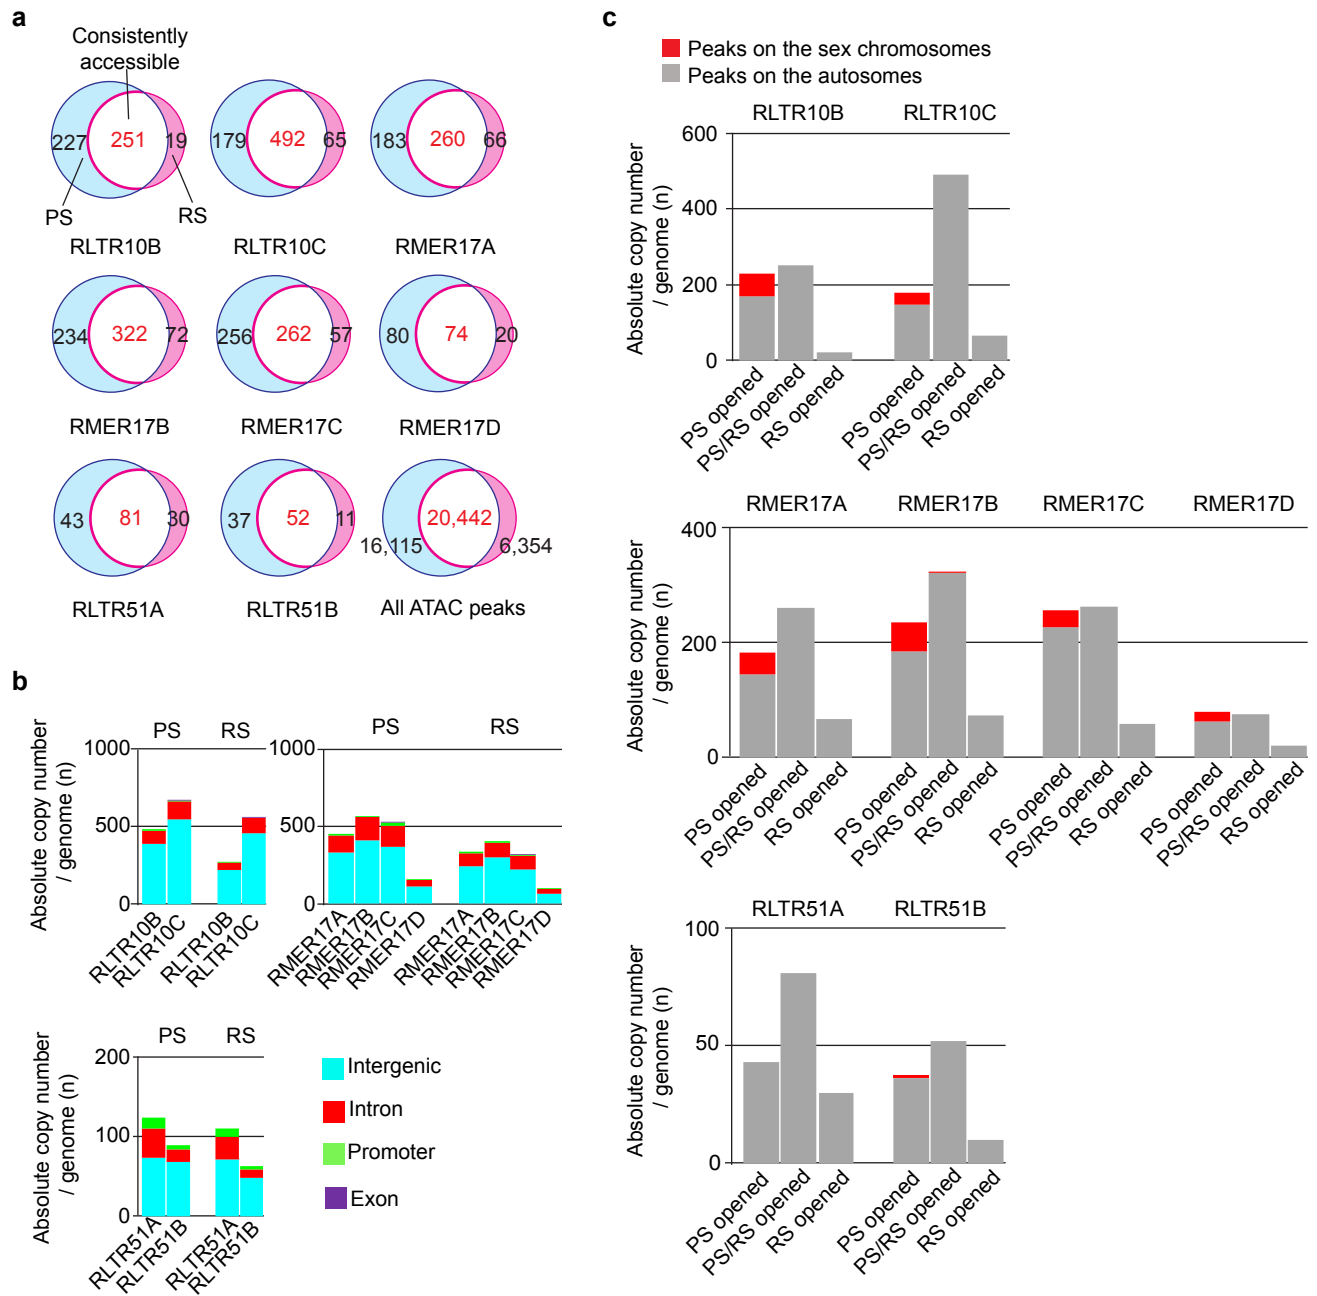

### Supplementary Figure 2. Genomic features of accessible ERVKs in late spermatogenesis.

(a) Venn diagram showing the overlap of young ERVK loci in accessible chromatin between pachytene spermatocytes (PS; blue) and round spermatids (RS; pink). (b) Bar charts depicting genomic distributions of young ERVK loci in accessible chromatin. Distributions are shown with colored bars. (c) Bar charts indicating absolute copy numbers on autosomes (gray) and sex chromosomes (red) of young ERVKs.

**a** RLTR10B (RepBase consensus)

Similarity: 172/317 (54.26%) by EZBioCloud Pairwise nucleotide sequence alignment for taconomy

Mouse RLTR10B: TGTGGGAAGC- - - CACATGTGCCGTTGCAGGGTGGCGCTGGCTACCGCTGGCCACCAAGCATACATAGGCA  
Rat RLTR10B: TGTGGGAGCGGGTGTAGCGGCAATCCCAAGATGGCGCCGGGACTGCTGCCGA- - - - -  
GTAAAGTTTTTTTTGCCAAGATGAGGTTTTGAGAATTAAACAAAATTAACCAATCAGATGAGAGACAAGTTAAACCAATCA- GAT  
- - - - - GTCTTACGACTAGCACCTGAAAGTAAGCCA- - - - - CGCCCCATC- - - GTGAGAGCTGCGCAGGCGCACCATGAC  
GAGAGACAAGTTAAACCAATCAGATGTGAGGCATGCAAATGAGGTGGTAAAGCATAAACCCATGCATAAACCAATCCGGGTGTGAGAC  
GATAGA- - - - - TCAGGCCATGTGACGTGGACCTATGAACGGAGGT- - - TACGCAGA- - - - - CTGGACGGTTGAGCGGAGTTGAG- -  
ACGCCCTCCTAGGCCATATTAAG- - - CAGCACCAGTTCTGGGGCTTGGGGTCTCTTCGCCTCTGCAATC- - - AAGCTCTCC  
- - - - - GGAGGTTATAAGGGAGTGCCGTCGGGGGCTGGATTGAGAGATTGTTGCTGCTTGCATGCTAAAAGGTTCTT  
CAATAAAC- - - - - GTGTGCAGAAAGGATCCTGTTGCAGCTGTGCTTCTTCTGCTGGCGAGTCAGGGCGCGCGCAA  
GAATAAACTGCTTTGAGAAGAACG- TCGTGGTGTGCTCCTTTCTGCTGGTTCGGGGTTGAAAGCGACA- -

**b** RMER17A (RepBase consensus)

Similarity: 189/319 (59.25%) by EZBioCloud Pairwise nucleotide sequence alignment for taconomy

Mouse RMER17A: TGTGGGGAATTCAGGCTGGTCCAGTTGAGCTGAGGTCTGAACCCAGTGGTGATAATTACCTACATGAC  
Rat RMER17A: - - - - -  
ACGGTAGGCATTCCTCATGCTCCTGGAACCTCTGGCTCCTGCCTAAGTTACCGCCCCCACAGCCCCACAAGAGAAGCAT  
- - - - -  
GGTTAGTAGTCACGCAGGCAATGTCCCAAGCTTCTGACCTTCAGGCTAGACTCCTCCC- - - CAGTTACCTAGCAACGTTAAAG- -  
- - - - - TGTTAGCATTCTGTCTAAGCTCCACCCCCACAGTTACCTGGCAACAGCCAGGT  
- - - - - ACCATAAGAGGGGCTGCTCGGCCCTCCTCGCTCTTTACTTGTCTCTTCTTTACTCCTTTGTTCTCTTAACT  
ATGCCTGACACTATAAAAAGGGGCTGCTTCCCCCTCCTCACTCTCTTGC- - - TCTTGCTTCTTCTCTTCTTCTTCCCCCTC  
TCTCACACTTCTTTCTCCTCTTCCCTTTCTCTTTGTCTTCTCTCCTCTCTCCTTTCTCTACTCTTCTCTCAGCCTTCTCTCT  
CTTCCCCCTTTGTCCCTTCTCTCCCAATCCC- - - CTCCCCCTTCCCTCCAGTGTCTCATGGCCGGCCTCT- - - ACTCCTCTCC  
CTCTCTCCCTCTCCCTCCCTCTCTCCTCTCTTATACCCCTGCCTTTCTACAATAAAGCTCTAAAACCATAGAGAGTCTCTGCT  
TCTTCTACTCTTCTCTCTCTCGTCCCTCTCCCTTGTCTCGTCTTTT- - - CATTAAACCTTTCCA- - - - - - - - CGTGGAAC  
CATCAAGATCTGCTGGGCTCACTCTCGTCAGTGTGGAAACCTCTTCCCCATCCTTCTCTCCCATAACCCCTGGTGGCTTTAGA  
CATGTTGGCCTGGTGTGGTTTGTCCGGATGCGAGCCGAGATTTCTACCCCAACA- - - - - - - - - - - - - - - - -  
AAGTAGCTCTGGGGCCCCAGGTAGGGCTGCCCTTGGCCACCCCCGAAGAGTGGGTGAGAGGCTTAGATGCCACCCAGGG  
- - - - -  
ATGAGTGGAAGGTAGATAGCAGCCCTCCCACCTGACTGACCAGAGAACAGGTGGAACCTCTGGCGGGGTGTGGGTCTTCCCCCTT  
- - - - -  
CCCCCTCTTCCCCAGGGCCCCCACCTTTTTGCTCCCAA  
- - - - -

**Supplementary Figure 3. Sequence similarities of young ERVK elements between mouse and rat.**  
**(a,b)** Pairwise alignments of RLTR10B **(a)** and RMER17A **(b)** entire consensus sequences between mouse and rat.

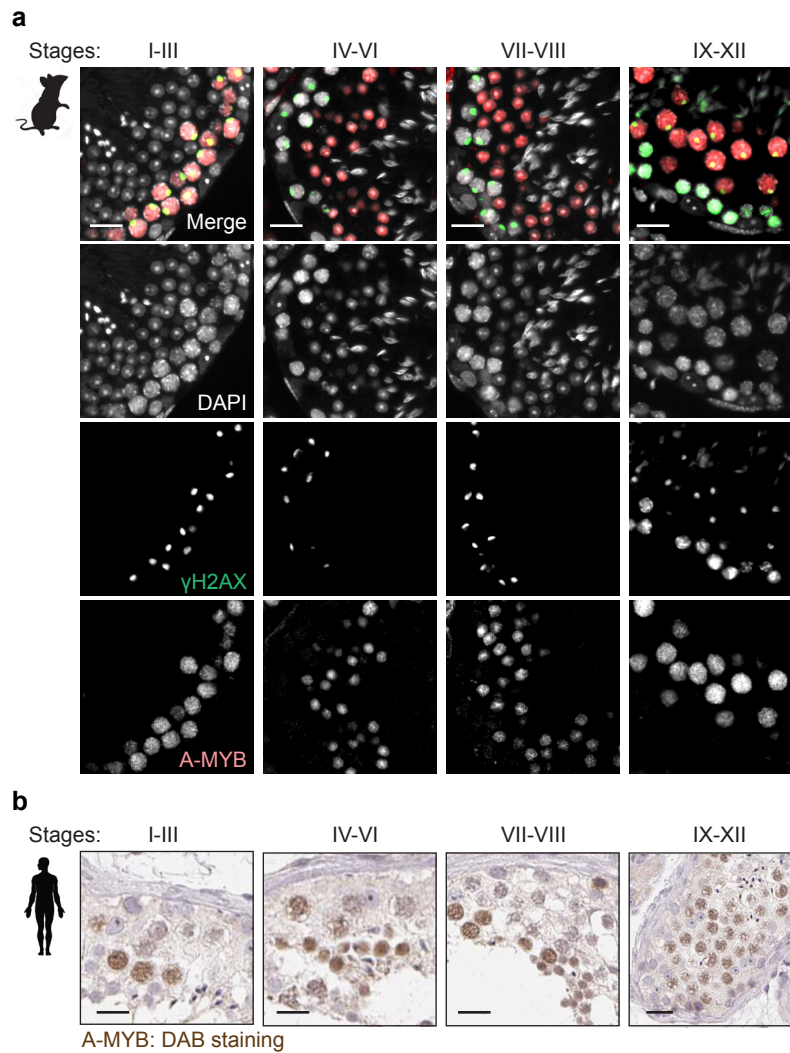

**Supplementary Figure 4. A-MYB are highly expressed both in mouse and human spermatocytes.**

(a) Immunofluorescence co-staining of 12-week-old mouse testicular cross sections for A-MYB (red) and  $\gamma$ H2AX (green), and counterstaining with DAPI (gray). The Roman numerals indicate cycles of seminiferous epithelium. (b) Representative images of immunohistological staining of 29-to-65-year-old human testicular sections for A-MYB (brown) and counterstaining with hematoxylin (adapted from the Human Protein Atlas ([www.proteinatlas.org/ENSG00000185697-MYBL1/tissue/testis#img](http://www.proteinatlas.org/ENSG00000185697-MYBL1/tissue/testis#img))). Scale Bars: 20  $\mu$ m.
